## Transcriptional regulatory networks in epiblast cells and during anterior neural plate development as modeled in epiblast stem cells

Makiko Iwafuchi-Doi, Kazunari Matsuda, Kazuhiro Murakami, Hitoshi Niwa, Paul J. Tesar, Jun Aruga, Isao Matsuo and Hisato Kondoh

There was an error published in *Development* **139**, 3926-3937.

Fig. S6 was incorrect. The correct Fig. S6, as shown below, now appears in the supplementary data.

We apologise to the authors and readers for this mistake.

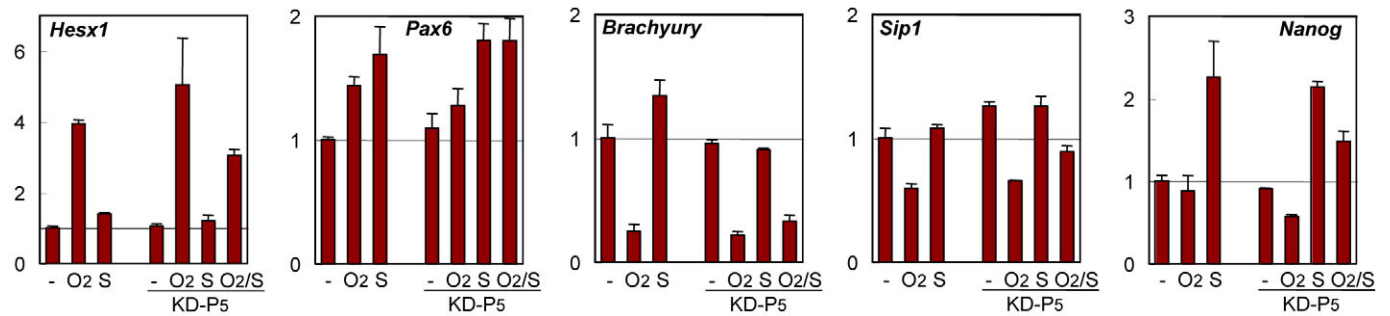

Source: https://cob.silverchair.com/dev/article-pdf/139/24/4675/1181786/4675.pdf
